# Supplementary material for: Potential Key Bases of Ribosomal RNA to Kingdom-Specific Spectra of Antibiotic Susceptibility and the Possible Archaeal Origin of Eukaryotes
Source: PLoS One. 2012 Jan 11;7(1):e29468. doi: 10.1371/journal.pone.0029468 (PMC3256160; doi:10.1371/journal.pone.0029468)
Supplement: File S4 — The screen capture 4 of the alignment of SSU (16–18S) rDNAs. This screen capture is corresponding to the red line 9 of the SSU rDNA part of Table 1. The asterisks in different colors mark the nucleotides specifically shared by different organisms, black: cellular organisms, red: archaea and eukaryotes. (PDF) [file pone.0029468.s006.pdf]

ActinobacteriaDQ23228

ActinobacteriaDQ23229

ActinobacteriaDQ23230

ActinobacteriaDQ23231

ActinobacteriaDQ23232

ActinobacteriaDQ23233

ActinobacteriaDQ23234

ActinobacteriaDQ23235

ActinobacteriaDQ23236

ActinobacteriaDQ23237

ActinobacteriaDQ23238

ActinobacteriaDQ23239

ActinobacteriaDQ23240

ActinobacteriaDQ23241

ActinobacteriaDQ23242

ActinobacteriaDQ23243

ActinobacteriaDQ23244

ActinobacteriaDQ23245

ActinobacteriaDQ23246

ActinobacteriaDQ23247

ActinobacteriaDQ23248

ActinobacteriaDQ23249

ActinobacteriaDQ23250

ActinobacteriaDQ23251

ActinobacteriaDQ23252

ActinobacteriaDQ23253

ActinobacteriaDQ23254

ActinobacteriaDQ23255

ActinobacteriaDQ23256

ActinobacteriaDQ23257

ActinobacteriaDQ23258

ActinobacteriaDQ23259

ActinobacteriaDQ23260

ActinobacteriaDQ23261

ActinobacteriaDQ23262

ActinobacteriaDQ23263

ActinobacteriaDQ23264

ActinobacteriaDQ23265

ActinobacteriaDQ23266

ActinobacteriaDQ23267

ActinobacteriaDQ23268

ActinobacteriaDQ23269

ActinobacteriaDQ23270

ActinobacteriaDQ23271

ActinobacteriaDQ23272

ActinobacteriaDQ23273

ActinobacteriaDQ23274

ActinobacteriaDQ23275

ActinobacteriaDQ23276

ActinobacteriaDQ23277

ActinobacteriaDQ23278

ActinobacteriaDQ23279

ActinobacteriaDQ23280

ActinobacteriaDQ23281

ActinobacteriaDQ23282

ActinobacteriaDQ23283

ActinobacteriaDQ23284

ActinobacteriaDQ23285

ActinobacteriaDQ23286

ActinobacteriaDQ23287

ActinobacteriaDQ23288

ActinobacteriaDQ23289

ActinobacteriaDQ23290

ActinobacteriaDQ23291

ActinobacteriaDQ23292

ActinobacteriaDQ23293

ActinobacteriaDQ23294

ActinobacteriaDQ23295

ActinobacteriaDQ23296

ActinobacteriaDQ23297

ActinobacteriaDQ23298

ActinobacteriaDQ23299

ActinobacteriaDQ23300

ActinobacteriaDQ23301

ActinobacteriaDQ23302

ActinobacteriaDQ23303

ActinobacteriaDQ23304

ActinobacteriaDQ23305

ActinobacteriaDQ23306

ActinobacteriaDQ23307

ActinobacteriaDQ23308

ActinobacteriaDQ23309

ActinobacteriaDQ23310

ActinobacteriaDQ23311

ActinobacteriaDQ23312

ActinobacteriaDQ23313

ActinobacteriaDQ23314

ActinobacteriaDQ23315

ActinobacteriaDQ23316

ActinobacteriaDQ23317

ActinobacteriaDQ23318

ActinobacteriaDQ23319

ActinobacteriaDQ23320

ActinobacteriaDQ23321

ActinobacteriaDQ23322

ActinobacteriaDQ23323

ActinobacteriaDQ23324

ActinobacteriaDQ23325

ActinobacteriaDQ23326

ActinobacteriaDQ23327

ActinobacteriaDQ23328

ActinobacteriaDQ23329

ActinobacteriaDQ23330

ActinobacteriaDQ23331

ActinobacteriaDQ23332

ActinobacteriaDQ23333

ActinobacteriaDQ23334

ActinobacteriaDQ23335

ActinobacteriaDQ23336

ActinobacteriaDQ23337

ActinobacteriaDQ23338

ActinobacteriaDQ23339

ActinobacteriaDQ23340

ActinobacteriaDQ23341

ActinobacteriaDQ23342

ActinobacteriaDQ23343

ActinobacteriaDQ23344

ActinobacteriaDQ23345

ActinobacteriaDQ23346

ActinobacteriaDQ23347

ActinobacteriaDQ23348

ActinobacteriaDQ23349

ActinobacteriaDQ23350

ActinobacteriaDQ23351

ActinobacteriaDQ23352

ActinobacteriaDQ23353

ActinobacteriaDQ23354

ActinobacteriaDQ23355

ActinobacteriaDQ23356

ActinobacteriaDQ23357

ActinobacteriaDQ23358

ActinobacteriaDQ23359

ActinobacteriaDQ23360

ActinobacteriaDQ23361

ActinobacteriaDQ23362

ActinobacteriaDQ23363

ActinobacteriaDQ23364

ActinobacteriaDQ23365

ActinobacteriaDQ23366

ActinobacteriaDQ23367

ActinobacteriaDQ23368

ActinobacteriaDQ23369

ActinobacteriaDQ23370

ActinobacteriaDQ23371

ActinobacteriaDQ23372

ActinobacteriaDQ23373

ActinobacteriaDQ23374

ActinobacteriaDQ23375

ActinobacteriaDQ23376

ActinobacteriaDQ23377

ActinobacteriaDQ23378

ActinobacteriaDQ23379

ActinobacteriaDQ23380

ActinobacteriaDQ23381

ActinobacteriaDQ23382

ActinobacteriaDQ23383

ActinobacteriaDQ23384

ActinobacteriaDQ23385

ActinobacteriaDQ23386

ActinobacteriaDQ23387

ActinobacteriaDQ23388

ActinobacteriaDQ23389

ActinobacteriaDQ23390

ActinobacteriaDQ23391

ActinobacteriaDQ23392

ActinobacteriaDQ23393

ActinobacteriaDQ23394

ActinobacteriaDQ23395

ActinobacteriaDQ23396

ActinobacteriaDQ23397

ActinobacteriaDQ23398

ActinobacteriaDQ23399

ActinobacteriaDQ23400

ActinobacteriaDQ23401

ActinobacteriaDQ23402

ActinobacteriaDQ23403

ActinobacteriaDQ23404

ActinobacteriaDQ23405

ActinobacteriaDQ23406

ActinobacteriaDQ23407

ActinobacteriaDQ23408

ActinobacteriaDQ23409

ActinobacteriaDQ23410

ActinobacteriaDQ23411

ActinobacteriaDQ23412

ActinobacteriaDQ23413

ActinobacteriaDQ23414

ActinobacteriaDQ23415

ActinobacteriaDQ23416

ActinobacteriaDQ23417

ActinobacteriaDQ23418

ActinobacteriaDQ23419

ActinobacteriaDQ23420

ActinobacteriaDQ23421

ActinobacteriaDQ23422

ActinobacteriaDQ23423

ActinobacteriaDQ23424

ActinobacteriaDQ23425

ActinobacteriaDQ23426

ActinobacteriaDQ23427

ActinobacteriaDQ23428

ActinobacteriaDQ23429

ActinobacteriaDQ23430

ActinobacteriaDQ23431

ActinobacteriaDQ23432

ActinobacteriaDQ23433

ActinobacteriaDQ23434

ActinobacteriaDQ23435

ActinobacteriaDQ23436

ActinobacteriaDQ23437

ActinobacteriaDQ23438

ActinobacteriaDQ23439

ActinobacteriaDQ23440

ActinobacteriaDQ23441

ActinobacteriaDQ23442

ActinobacteriaDQ23443

ActinobacteriaDQ23444

ActinobacteriaDQ23445

ActinobacteriaDQ23446

ActinobacteriaDQ23447

ActinobacteriaDQ23448

ActinobacteriaDQ23449

ActinobacteriaDQ23450

ActinobacteriaDQ23451

ActinobacteriaDQ23452

ActinobacteriaDQ23453

ActinobacteriaDQ23454

ActinobacteriaDQ23455

ActinobacteriaDQ23456

ActinobacteriaDQ23457

ActinobacteriaDQ23458

ActinobacteriaDQ23459

ActinobacteriaDQ23460

ActinobacteriaDQ23461

ActinobacteriaDQ23462

ActinobacteriaDQ23463

ActinobacteriaDQ23464

ActinobacteriaDQ23465

ActinobacteriaDQ23466

ActinobacteriaDQ23467

ActinobacteriaDQ23468

ActinobacteriaDQ23469

ActinobacteriaDQ23470

ActinobacteriaDQ23471

ActinobacteriaDQ23472

ActinobacteriaDQ23473

ActinobacteriaDQ23474

ActinobacteriaDQ23475

ActinobacteriaDQ23476

ActinobacteriaDQ23477

ActinobacteriaDQ23478

ActinobacteriaDQ23479

ActinobacteriaDQ23480

ActinobacteriaDQ23481

ActinobacteriaDQ23482

ActinobacteriaDQ23483

ActinobacteriaDQ23484

ActinobacteriaDQ23485

ActinobacteriaDQ23486

ActinobacteriaDQ23487

ActinobacteriaDQ23488

ActinobacteriaDQ23489

ActinobacteriaDQ23490

ActinobacteriaDQ23491

ActinobacteriaDQ23492

ActinobacteriaDQ23493

ActinobacteriaDQ23494

ActinobacteriaDQ23495

ActinobacteriaDQ23496

ActinobacteriaDQ23497

ActinobacteriaDQ23498

ActinobacteriaDQ23499

ActinobacteriaDQ23500

ActinobacteriaDQ23501

ActinobacteriaDQ23502

ActinobacteriaDQ23503

ActinobacteriaDQ23504

ActinobacteriaDQ23505

ActinobacteriaDQ23506

ActinobacteriaDQ23507

ActinobacteriaDQ23508

ActinobacteriaDQ23509

ActinobacteriaDQ23510

ActinobacteriaDQ23511

ActinobacteriaDQ23512

ActinobacteriaDQ23513

ActinobacteriaDQ23514

ActinobacteriaDQ23515

ActinobacteriaDQ23516

ActinobacteriaDQ23517

ActinobacteriaDQ23518

ActinobacteriaDQ23519

ActinobacteriaDQ23520

ActinobacteriaDQ23521

ActinobacteriaDQ23522

ActinobacteriaDQ23523

ActinobacteriaDQ23524

ActinobacteriaDQ23525

ActinobacteriaDQ23526

ActinobacteriaDQ23527

ActinobacteriaDQ23528

ActinobacteriaDQ23529

ActinobacteriaDQ23530

ActinobacteriaDQ23531

ActinobacteriaDQ23532

ActinobacteriaDQ23533

ActinobacteriaDQ23534

ActinobacteriaDQ23535

ActinobacteriaDQ23536

ActinobacteriaDQ23537

ActinobacteriaDQ23538

ActinobacteriaDQ23539

ActinobacteriaDQ23540

ActinobacteriaDQ23541

ActinobacteriaDQ23542

ActinobacteriaDQ23543

ActinobacteriaDQ23544

ActinobacteriaDQ23545

ActinobacteriaDQ23546

ActinobacteriaDQ23547

ActinobacteriaDQ23548

ActinobacteriaDQ23549

ActinobacteriaDQ23550

ActinobacteriaDQ23551

ActinobacteriaDQ23552

ActinobacteriaDQ23553

ActinobacteriaDQ23554

ActinobacteriaDQ23555

ActinobacteriaDQ23556

ActinobacteriaDQ23557

ActinobacteriaDQ23558

ActinobacteriaDQ23559

ActinobacteriaDQ23560

ActinobacteriaDQ23561

ActinobacteriaDQ23562

ActinobacteriaDQ23563

ActinobacteriaDQ23564

ActinobacteriaDQ23565

ActinobacteriaDQ23566

ActinobacteriaDQ23567

ActinobacteriaDQ23568

ActinobacteriaDQ23569

ActinobacteriaDQ23570

ActinobacteriaDQ23571

ActinobacteriaDQ23572

ActinobacteriaDQ23573

ActinobacteriaDQ23574

ActinobacteriaDQ23575

ActinobacteriaDQ23576

ActinobacteriaDQ23577

ActinobacteriaDQ23578

ActinobacteriaDQ23579

ActinobacteriaDQ23580

ActinobacteriaDQ23581

ActinobacteriaDQ23582

ActinobacteriaDQ23583

ActinobacteriaDQ23584

ActinobacteriaDQ23585

ActinobacteriaDQ23586

ActinobacteriaDQ23587

ActinobacteriaDQ23588

ActinobacteriaDQ23589

ActinobacteriaDQ23590

ActinobacteriaDQ23591

ActinobacteriaDQ23592

ActinobacteriaDQ23593

ActinobacteriaDQ23594

ActinobacteriaDQ23595

ActinobacteriaDQ23596

ActinobacteriaDQ23597

ActinobacteriaDQ23598

ActinobacteriaDQ23599

ActinobacteriaDQ23600

ActinobacteriaDQ23601

ActinobacteriaDQ23602

ActinobacteriaDQ23603

ActinobacteriaDQ23604

ActinobacteriaDQ23605

ActinobacteriaDQ23606

ActinobacteriaDQ23607

ActinobacteriaDQ23608

ActinobacteriaDQ23609

ActinobacteriaDQ23610

ActinobacteriaDQ23611

ActinobacteriaDQ23612

ActinobacteriaDQ23613

ActinobacteriaDQ23614

ActinobacteriaDQ23615

ActinobacteriaDQ23616

ActinobacteriaDQ23617

ActinobacteriaDQ23618

ActinobacteriaDQ23619

ActinobacteriaDQ23620

ActinobacteriaDQ23621

ActinobacteriaDQ23622

ActinobacteriaDQ23623

ActinobacteriaDQ23624

ActinobacteriaDQ23625

ActinobacteriaDQ23626

ActinobacteriaDQ23627

ActinobacteriaDQ23628

ActinobacteriaDQ23629

ActinobacteriaDQ23630

ActinobacteriaDQ23631

ActinobacteriaDQ23632

ActinobacteriaDQ23633

ActinobacteriaDQ23634

ActinobacteriaDQ23635

ActinobacteriaDQ23636

ActinobacteriaDQ23637

ActinobacteriaDQ23638

ActinobacteriaDQ23639

ActinobacteriaDQ23640

ActinobacteriaDQ23641

ActinobacteriaDQ23642

ActinobacteriaDQ23643

ActinobacteriaDQ23644

ActinobacteriaDQ23645

ActinobacteriaDQ23646

ActinobacteriaDQ23647

ActinobacteriaDQ23648

ActinobacteriaDQ23649

ActinobacteriaDQ23650

ActinobacteriaDQ23651

ActinobacteriaDQ23652

ActinobacteriaDQ23653

ActinobacteriaDQ23654

ActinobacteriaDQ23655

ActinobacteriaDQ23656

ActinobacteriaDQ23657

ActinobacteriaDQ23658

ActinobacteriaDQ23659

ActinobacteriaDQ23660

ActinobacteriaDQ23661

ActinobacteriaDQ23662

ActinobacteriaDQ23663

ActinobacteriaDQ23664

ActinobacteriaDQ23665

ActinobacteriaDQ23666

ActinobacteriaDQ23667

ActinobacteriaDQ23668

ActinobacteriaDQ23669

ActinobacteriaDQ23670

ActinobacteriaDQ23671

ActinobacteriaDQ23672

ActinobacteriaDQ23673

ActinobacteriaDQ23674

ActinobacteriaDQ23675

ActinobacteriaDQ23676

ActinobacteriaDQ23677

ActinobacteriaDQ23678

ActinobacteriaDQ23679

ActinobacteriaDQ23680

ActinobacteriaDQ23681

ActinobacteriaDQ23682

ActinobacteriaDQ23683

ActinobacteriaDQ23684

ActinobacteriaDQ23685

ActinobacteriaDQ23686

ActinobacteriaDQ23687

ActinobacteriaDQ23688

ActinobacteriaDQ23689

ActinobacteriaDQ23690

ActinobacteriaDQ23691

ActinobacteriaDQ23692

ActinobacteriaDQ23693

ActinobacteriaDQ23694

ActinobacteriaDQ23695

ActinobacteriaDQ23696

ActinobacteriaDQ23697

ActinobacteriaDQ23698

ActinobacteriaDQ23699

ActinobacteriaDQ23700

ActinobacteriaDQ23701

ActinobacteriaDQ23702

ActinobacteriaDQ23703

ActinobacteriaDQ23704

ActinobacteriaDQ23705

ActinobacteriaDQ23706

ActinobacteriaDQ23707

ActinobacteriaDQ23708

ActinobacteriaDQ23709

ActinobacteriaDQ23710

ActinobacteriaDQ23711

ActinobacteriaDQ23712

ActinobacteriaDQ23713

ActinobacteriaDQ23714

ActinobacteriaDQ23715

ActinobacteriaDQ23716

ActinobacteriaDQ23717

ActinobacteriaDQ23718

ActinobacteriaDQ23719

ActinobacteriaDQ23720

ActinobacteriaDQ23721

ActinobacteriaDQ23722

ActinobacteriaDQ23723

ActinobacteriaDQ23724

ActinobacteriaDQ23725

ActinobacteriaDQ23726

ActinobacteriaDQ23727

ActinobacteriaDQ23728

ActinobacteriaDQ23729

ActinobacteriaDQ23730

ActinobacteriaDQ23731

ActinobacteriaDQ23732

ActinobacteriaDQ23733

ActinobacteriaDQ23734

ActinobacteriaDQ23735

ActinobacteriaDQ23736

ActinobacteriaDQ23737

ActinobacteriaDQ23738

ActinobacteriaDQ23739

ActinobacteriaDQ23740

ActinobacteriaDQ23741

ActinobacteriaDQ23742

ActinobacteriaDQ23743

ActinobacteriaDQ23744

ActinobacteriaDQ23745

ActinobacteriaDQ23746

ActinobacteriaDQ23747

ActinobacteriaDQ23748

ActinobacteriaDQ23749

ActinobacteriaDQ23750

ActinobacteriaDQ23751

ActinobacteriaDQ23752

ActinobacteriaDQ23753

ActinobacteriaDQ23754

ActinobacteriaDQ23755

ActinobacteriaDQ23756

ActinobacteriaDQ23757

ActinobacteriaDQ23758

ActinobacteriaDQ23759

ActinobacteriaDQ23760

ActinobacteriaDQ23761

ActinobacteriaDQ23762

ActinobacteriaDQ23763

ActinobacteriaDQ23764

ActinobacteriaDQ23765

ActinobacteriaDQ23766

ActinobacteriaDQ23767

ActinobacteriaDQ23768

ActinobacteriaDQ23769

ActinobacteriaDQ23770

ActinobacteriaDQ23771

ActinobacteriaDQ23772

ActinobacteriaDQ23773

ActinobacteriaDQ23774

ActinobacteriaDQ23775

ActinobacteriaDQ23776

ActinobacteriaDQ23777

ActinobacteriaDQ23778

ActinobacteriaDQ23779

ActinobacteriaDQ23780

ActinobacteriaDQ23781

ActinobacteriaDQ23782

ActinobacteriaDQ23783

ActinobacteriaDQ23784

ActinobacteriaDQ23785

ActinobacteriaDQ23786

ActinobacteriaDQ23787

ActinobacteriaDQ23788

ActinobacteriaDQ23789

ActinobacteriaDQ23790

ActinobacteriaDQ23791

ActinobacteriaDQ23792

ActinobacteriaDQ23793

ActinobacteriaDQ23794

ActinobacteriaDQ23795

ActinobacteriaDQ23796

ActinobacteriaDQ23797

ActinobacteriaDQ23798

ActinobacteriaDQ23799

ActinobacteriaDQ23800

ActinobacteriaDQ23801

ActinobacteriaDQ23802

ActinobacteriaDQ23803

ActinobacteriaDQ23804

ActinobacteriaDQ23805

ActinobacteriaDQ23806

ActinobacteriaDQ23807

ActinobacteriaDQ23808

ActinobacteriaDQ23809

ActinobacteriaDQ23810

ActinobacteriaDQ23811

ActinobacteriaDQ23812

ActinobacteriaDQ23813

ActinobacteriaDQ23814

ActinobacteriaDQ23815

ActinobacteriaDQ23816

ActinobacteriaDQ23817

ActinobacteriaDQ23818

ActinobacteriaDQ23819

ActinobacteriaDQ23820

ActinobacteriaDQ23821

ActinobacteriaDQ23822

ActinobacteriaDQ23823

ActinobacteriaDQ23824

ActinobacteriaDQ23825

ActinobacteriaDQ23826

ActinobacteriaDQ23827

ActinobacteriaDQ23828

ActinobacteriaDQ23829

ActinobacteriaDQ23830

ActinobacteriaDQ23831

ActinobacteriaDQ23832

ActinobacteriaDQ23833

ActinobacteriaDQ23834

ActinobacteriaDQ23835

ActinobacteriaDQ23836

ActinobacteriaDQ23837

ActinobacteriaDQ23838

ActinobacteriaDQ23839

ActinobacteriaDQ23840

ActinobacteriaDQ23841

ActinobacteriaDQ23842

ActinobacteriaDQ23843

ActinobacteriaDQ23844

ActinobacteriaDQ23845

ActinobacteriaDQ23846

ActinobacteriaDQ23847

ActinobacteriaDQ23848

ActinobacteriaDQ23849

ActinobacteriaDQ23850

ActinobacteriaDQ23851

ActinobacteriaDQ23852

ActinobacteriaDQ23853

ActinobacteriaDQ23854

ActinobacteriaDQ23855

ActinobacteriaDQ23856

ActinobacteriaDQ23857

ActinobacteriaDQ23858

ActinobacteriaDQ23859

ActinobacteriaDQ23860

ActinobacteriaDQ23861

ActinobacteriaDQ23862

ActinobacteriaDQ23863

ActinobacteriaDQ23864

ActinobacteriaDQ23865

ActinobacteriaDQ23866

ActinobacteriaDQ23867

ActinobacteriaDQ23868

ActinobacteriaDQ23869

ActinobacteriaDQ23870

ActinobacteriaDQ23871

ActinobacteriaDQ23872

ActinobacteriaDQ23873

ActinobacteriaDQ23874

ActinobacteriaDQ23875

ActinobacteriaDQ23876

ActinobacteriaDQ23877

ActinobacteriaDQ23878

ActinobacteriaDQ23879

ActinobacteriaDQ23880

ActinobacteriaDQ23881

ActinobacteriaDQ23882

ActinobacteriaDQ23883

ActinobacteriaDQ23884

ActinobacteriaDQ23885

ActinobacteriaDQ23886

ActinobacteriaDQ23887

ActinobacteriaDQ23888

ActinobacteriaDQ23889

ActinobacteriaDQ23890

ActinobacteriaDQ23891

ActinobacteriaDQ23892

ActinobacteriaDQ23893

ActinobacteriaDQ23894

ActinobacteriaDQ23895

ActinobacteriaDQ23896

ActinobacteriaDQ23897

ActinobacteriaDQ23898

ActinobacteriaDQ23899

ActinobacteriaDQ23900

ActinobacteriaDQ23901

ActinobacteriaDQ23902

ActinobacteriaDQ23903

ActinobacteriaDQ23904

ActinobacteriaDQ23905

ActinobacteriaDQ23906

ActinobacteriaDQ23907

ActinobacteriaDQ23908

ActinobacteriaDQ23909

ActinobacteriaDQ23910

ActinobacteriaDQ23911

ActinobacteriaDQ23912

ActinobacteriaDQ23913

ActinobacteriaDQ23914

ActinobacteriaDQ23915

ActinobacteriaDQ23916

ActinobacteriaDQ23917

ActinobacteriaDQ23918

ActinobacteriaDQ23919

ActinobacteriaDQ23920

ActinobacteriaDQ23921

ActinobacteriaDQ23922

ActinobacteriaDQ23923

ActinobacteriaDQ23924

ActinobacteriaDQ23925

ActinobacteriaDQ23926

ActinobacteriaDQ23927

ActinobacteriaDQ23928

ActinobacteriaDQ23929

ActinobacteriaDQ23930

ActinobacteriaDQ23931

ActinobacteriaDQ23932

ActinobacteriaDQ23933

ActinobacteriaDQ23934

ActinobacteriaDQ23935

ActinobacteriaDQ23936

ActinobacteriaDQ23937

ActinobacteriaDQ23938

ActinobacteriaDQ23939

ActinobacteriaDQ23940

ActinobacteriaDQ23941

ActinobacteriaDQ23942

ActinobacteriaDQ23943

ActinobacteriaDQ23944

ActinobacteriaDQ23945

ActinobacteriaDQ23946

ActinobacteriaDQ23947

ActinobacteriaDQ23948

ActinobacteriaDQ23949

ActinobacteriaDQ23950

ActinobacteriaDQ23951

ActinobacteriaDQ23952

ActinobacteriaDQ23953

ActinobacteriaDQ23954

ActinobacteriaDQ23955

ActinobacteriaDQ23956

ActinobacteriaDQ23957

ActinobacteriaDQ23958

ActinobacteriaDQ23959

ActinobacteriaDQ23960

ActinobacteriaDQ23961

ActinobacteriaDQ23962

ActinobacteriaDQ23963

ActinobacteriaDQ23964

ActinobacteriaDQ23965

ActinobacteriaDQ23966

ActinobacteriaDQ23967

ActinobacteriaDQ23968

ActinobacteriaDQ23969

ActinobacteriaDQ23970

ActinobacteriaDQ23971

ActinobacteriaDQ23972

ActinobacteriaDQ23973

ActinobacteriaDQ23974

ActinobacteriaDQ23975

ActinobacteriaDQ23976

ActinobacteriaDQ23977

ActinobacteriaDQ23978

ActinobacteriaDQ23979

ActinobacteriaDQ23980

ActinobacteriaDQ23981

ActinobacteriaDQ23982

ActinobacteriaDQ23983

ActinobacteriaDQ23984

ActinobacteriaDQ23985

ActinobacteriaDQ23986

ActinobacteriaDQ23987

ActinobacteriaDQ23988

ActinobacteriaDQ23989

ActinobacteriaDQ23990

ActinobacteriaDQ23991

ActinobacteriaDQ23992

ActinobacteriaDQ23993

ActinobacteriaDQ23994

ActinobacteriaDQ23995

ActinobacteriaDQ23996

ActinobacteriaDQ23997

ActinobacteriaDQ23998

ActinobacteriaDQ23999

ActinobacteriaDQ24000

ActinobacteriaDQ24001

<
