# Supplementary material for: Potential Key Bases of Ribosomal RNA to Kingdom-Specific Spectra of Antibiotic Susceptibility and the Possible Archaeal Origin of Eukaryotes
Source: PLoS One. 2012 Jan 11;7(1):e29468. doi: 10.1371/journal.pone.0029468 (PMC3256160; doi:10.1371/journal.pone.0029468)
Supplement: Table S1 — Taxon sampling of SSU rDNAs. There are 124 taxa for bacteria, 21 taxa for archaea and 362 taxa for eukaryotes. (XLS) [file pone.0029468.s001.xls]

## Sheet: Nature sampling
Table S1: Taxa list for SSU rDNA.
Kingdom	phylum	class	order/family/genus	Accession Number
Bacteria	Actinobacteria	Actinobacteria	Acidimicrobiales	DQ223228
			Actinomycetales	NC_002677
			Bifidobacteriales	NC_004307
			Coriobacteriales	AB015945
			Euzebyales	AB478418
			Nitriliruptorales	EF422408
			Rubrobacterales	NC_008148
			Solirubrobacterales	NC_013739
	Aquificae	Aquificae	Aquificales	NC_015185
	Bacteroidetes	Bacteroidetes	Bacteroidales	NC_004663
		Cytophagia	Cytophagales	NC_013730
		Flavobacteria	Flavobacteriales	DQ073102
		Sphingobacteria	Sphingobacteriales	NC_007677
	Chlorobi	Chlorobia	Chlorobiales	NC_002932
		Ignavibacteria	Ignavibacteriales	AB478415
	Caldiserica	Caldisericia	Caldisericales	AB428365
	Chlamydiae	Chlamydiae	Chlamydiales	NC_002179
	Lentisphaerae		Lentisphaerales	AY390429
			Victivallales	AF275917
	Verrucomicrobia	Opitutae	Opitutales	NC_010571
			Puniceicoccales	NC_014008
		Spartobacteria		Y07576
		Verrucomicrobiae	Verrucomicrobiales	DQ351738
		unclassified		NC_010794
	Chloroflexi	Anaerolineae	Anaerolinaeles	AB046413
		Caldilineae	Caldilineales	AB067647
		Chloroflexi	Chloroflexales	AF421756
			Herpetosiphonales	AF039293
		Dehalococcoidetes		NC_007356
		Ktedonobacteria	Ktedonobacterales	AB510917
			Thermogemmatisporales	AB547913
		Thermomicrobia	Sphaerobacterales	AJ420142
			Thermomicrobiales	M34115
	Chrysiogenetes	Chrysiogenetes	Chrysiogenales	X81319
	Cyanobacteria		Chroococcales	NC_007776
			Gloeobacterales	NC_005125
			Nostocales	NC_003272
			Oscillatoriales	NC_008312
			Pleurocapsales	DQ293994
			Prochlorales	NC_007335
			Stigonematales	X68780
			unclassified	NC_009925
	Deferribacteres	Deferribacteres	Deferribacterales	AB189456
	Deinococcus-Thermus	Deinococci	Deinococcales	NC_008025
			Thermales	NC_006461
	Dictyoglomi	Dictyoglomi		X69194
	Elusimicrobia		Elusimicrobiales	NC_010644
			unclassified	NS_000191
	Acidobacteria	Acidobacteria	Acidobacteriales	NC_014963
		Holophagae	Acanthopleuribacterales	AB303221
			Holophagales	X77215
		Solibacteres		AY234728
		unclassified		NC_008009
	Fibrobacteres	Fibrobacteres		AB252949
	Firmicutes	Bacilli	Bacillales	NC_004193
			Lactobacillales	NC_005362
		Clostridia	Clostridiales	NC_007907
			Halanaerobiales	AY965613
			Thermoanaerobacteriales	NC_007644
		Erysipelotrichi	Erysipelotrichales	AB034200
		Negativicutes	Selenomonadales	NC_013520
		Thermolithobacteria	Thermolithobacterales	DQ095862
	Fusobacteria	Fusobacteria		NC_003454
	Gemmatimonadetes	Gemmatimonadetes		DQ453807
	Nitrospirae	Nitrospirae	Nitrospirales	X82559
	Planctomycetes	Phycisphaerae	Phycisphaerales	AB447464
		Planctomycetacia	Planctomycetales	NC_005027
	Proteobacteria	Alphaproteobacteria	Caulobacterales	NC_002696
			Kiloniellales	AM749667
			Kopriimonadales	DQ167245
			Kordiimonadales	DQ889871
			Parvularculales	AF544015
			Rhizobiales	NC_008254
			Rhodobacterales	NC_007802
			Rhodospirillales	NC_008343
			Rickettsiales	NC_006833
			Sneathiellales	DQ219355
			Sphingomonadales	NC_007722
		Betaproteobacteria	Burkholderiales	NC_003295
			Ferritrophicales	DQ386263
			Gallionellales	NC_014394
			Hydrogenophilales	NC_007404
			Methylophilales	NC_007947
			Neisseriales	NC_002946
			Nitrosomonadales	NC_004757
			Procabacteriales	AF177426
			Rhodocyclales	NC_007298
		Deltaproteobacteria	Bdellovibrionales	NC_005363
			Desulfarculales	NC_014365
			Desulfobacterales	NC_006138
			Desulfovibrionales	NC_007519
			Desulfurellales	X72768
			Desulfuromonadales	NC_007498
			Myxococcales	NC_007760
			Syntrophobacterales	NC_007759
		Epsilonproteobacteria	Campylobacterales	NC_007575
			Nautiliales	AF357197
		Gammaproteobacteria	Acidithiobacillales	DQ909079
			Aeromonadales	DQ207728
			Alteromonadales	NC_006512
			Cardiobacteriales	M35016
			Chromatiales	NC_007484
			Enterobacteriales	NC_008253
			Legionellales	NC_006369
			Methylococcales	NC_002977
			Oceanospirillales	NC_008260
			Pasteurellales	NC_002663
			Pseudomonadales	NC_004129
			Salinisphaerales	GU452538
			Thiotrichales	NC_008245
			Vibrionales	NC_006370
			Xanthomonadales	NC_007705
		Zetaproteobacteria	Mariprofundales	EF493243
		unclassified		NC_008576
	Spirochaetes	Spirochaetes	Spirochaetales	NC_000919
	Tenericutes	Mollicutes	Acholeplasmatales	NC_005303
			Anaeroplasmatales	AB055910
			Entomoplasmatales	NC_006055
			Haloplasmatales	EF999972
			Mycoplasmatales	NC_006360
	Thermodesulfobacteria	Thermodesulfobacteria	Thermodesulfobacteriales	AY082369
	Thermotogae	Thermotogae	Thermotogales	NC_000853
	unclassified			NC_013525
				NS_000195
Archaea	Crenarchaeota	Thermoprotei	Acidilobales	NC_014374
			Desulfurococcales	BA000002reverse
			Fervidicoccales	EF552404
			Sulfolobales	NC_003106
			Thermoproteales	NC_003364
	Euryarchaeota	Archaeoglobi	Archaeoglobales	NC_000917
		Halobacteria	Halobacteriales	NC_002607
		Methanobacteria	Methanobacteriales	NC_000916
		Methanococci	Methanococcales	NC_005791
		Methanocellales		NC_013665
		Methanomicrobia	Methanomicrobiales	NC_007796
			Methanosarcinales	NC_003552
		Methanopyri	Methanopyrales	NC_003551
		Thermococci	Thermococcales	NC_000868
		Thermoplasmata	Thermoplasmatales	NC_002578
		unclassified		NC_013926
				NC_009464
	Korarchaeota			DQ465911
	Nanoarchaeota			NC_005213
	Thaumarchaeota		Cenarchaeales	NC_014820
		unclassified		NC_010085
stem eukaryotes	Amoebozoa	Archamoebae	Entamoebidae	AY769863
				AF149916
			Mastigamoebidae(Pelobiontida)	L23799
		Centramoebida	Acanthamoebidae	AY176047
		Flabellinea	Thecamoebidae	DQ122380
		Himatismenida	Cochliopodiidae	AY775130
		Mycetozoa	Dictyosteliida	AM168079
			Hyperamoeba	AF411290
			Myxogastria	AM231291
			Protosteliales	FJ766469
		Phalansterium	Phalansterium	AF280078
		Tubulinea/Lobosea	Arcellinida	AY848964
			Euamoebida	EU137741
	Apusozoa	Apusomonadidae	Apusomonadidae	AY050181
	Centroheliozoa			AF534708
	Cryptophyta	Cryptophyta	Cryptomonadales	L28812
			Pyrenomonadales	AJ010592
	Euglenozoa	Diplonemida	Diplonemida	AY425012
		Euglenida	Cryptoglena	AY014998
			Distigma	AF386644
			Euglenales	AF283307
			Eutreptiales	AJ532396
			Heteronematales	AY425008
			Rhabdomonadales	AF110418
			Sphenomonadales	AF403160
		Kinetoplastida	Kinetoplastida	AC012647
		Symbiontida	Symbiontida	HM004354
	Fornicata	Carpediemonas	Carpediemonas	GU827589
		Diplomonadida	Hexamitidae	DQ812526
		Dysnectes	Dysnectes	GU827595
		Ergobibamus	Ergobibamus	GU827592
		Kipferlia	Kipferlia	GU827604
		Retortamonadidae		EU009463
	Glaucocystophyceae	Glaucocystophyceae	Cyanophoraceae	X68483
			Cyanoptyche	AJ007275
			Glaucocystales	X70803
			Gloeochaetales	X81901
	Haptophyceae	Haptophyceae	Coccolithales	AJ246263
			Coccosphaerales	AB183608
			Isochrysidales	AJ246266
			Pavlovales	L34669
			Phaeocystales	AJ278035
			Prymnesiales	AM490994
			Syracosphaerales	AM490985
			Zygodiscales	AB250785
	Heterolobosea	Heterolobosea	Acrasida	AF011458
			Schizopyrenida	AF338418
	Jakobidae	Jakobidae	Jakobidae	AY965870
	Katablepharidophyta	Katablepharidophyta		DQ980480
	Malawimonadidae	Malawimonadidae	Malawimonadidae	AY117420
	Oxymonadida	Oxymonadida	Oxymonadida	AY831435
	Parabasalidea		Cristamonadida	AB458854
			Honigbergiellida	GQ254640
			Hypotrichomonadida	AF076958
			Spirotrichonymphida	AB183881
			Trichomonadida	AY821962
			Trichonymphida	U17512
			Tritrichomonadida	M81842
	Rhodophyta	Bangiophyceae	Bangiales	AF342745
		Compsopogonophyceae	Compsopogonales	AF087125
		Florideophyceae	Gigartinales	AY617133
			Hildenbrandiales	L19345
		Rhodellophyceae	Rhodellales	AB183619
		Stylonematophyceae	Stylonematales	AF342750
Alveolata	Apicomplexa	Aconoidasida	Haemosporida	NC_004325
		Coccidia	Eucoccidiorida	AF017121
		Colpodellidae	Colpodellidae	DQ174732
		Gregarinia	Eugregarinida	DQ093793
	Chromerida			DQ174731
	Ciliophora	Armophorea	Clevelandellida	AF145353
		Colpodea	Grossglockneriida	AF060452
		Litostomatea	Vestibuliferida	AJ292526
		Nassophorea	Nassulida	X65150
		Oligohymenophorea	Peritrichia	DQ487201
		Phyllopharyngea	Endogenida	AY332721
		Prostomatea	Prorodontida	DQ487194
		Spirotrichea	Euplotida	AJ310489
		Heterotrichea	Heterotrichida	AJ277877
		Karyorelictea	Loxodida	U24248
	Dinophyceae	Dinophyceae	Syndiniales	AF069516
	Ellobiopsidae	Ellobiopsidae	Ellobiopsidae	AY340590
	Perkinsea	Perkinsea	Perkinsida	AF530535
	Voromonas	Voromonas	Voromonas	AF280076
Rhizaria	Rhizaria	Acantharea	Symphyacanthida	AB178580
		Cercozoa	Cercomonadida	AF534712
			Desmothoracida	AY305009
		Foraminifera	Allogromida	X86093
			Lagenina	EU672990
			Miliolina	AJ404295
			Rotaliida	DQ408650
			Textulariida	AJ318224
			Xenophyophora	EU649778
		Gromiidae		AJ457811
		Haplosporidia	Haplosporidiidae	DQ219484
		Paradinium		EU189032
		Polycystinea	Spumellaria	AY266295
		Sticholonche/Taxopodida		AY268045
Stramenopila	Actinophryidae	Actinophryidae	Actinophryidae	AY305011
	Bacillariophyta	Bacillariophyceae	Bacillariales	AJ867277
		Coscinodiscophyceae	Cymatosirales	X85387
			Thalassiosirales	AJ810854
		Fragilariophyceae	Fragilariales	AY485505
			Striatellales	AY485501
	Bicosoecida	Bicosoecida	Bicosoecida	AF315604
	Blastocystis	Blastocystis	Blastocystis	AY266468
	Bolidophyceae			AF123595
	Chrysomerophyceae	Chrysomerophyceae	Chrysomeridales	U78034
	Chrysophyceae	Chrysophyceae	Chromulinales	GU220392
	Developayella	Developayella	Developayella	U37107
	Dictyochophyceae	Dictyochophyceae	Rhizochromulinales	U14388
	Eustigmatophyceae		Eustigmatales	AF067956
	Hyphochytriomycetes	Hyphochytriomycetes		AF163295
	Labyrinthulida	Labyrinthulida	Labyrinthulida	AF304465
	Oikomonadaceae	Oikomonadaceae	Oikomonadaceae	AY520450
	Oomycetes	Oomycetes	Olpidiopsidales	AB287418
			Peronosporales	AY744947
	Pelagophyceae	Pelagophyceae	Aureoumbra	U40258
	Phaeothamniophyceae	Phaeothamniophyceae	Pleurochloridellales	AB365207
	Picobiliphytes	Picobiliphytes	Picobiliphytes	EF050072
	Pinguiophyceae	Pinguiophyceae	Pinguiophyceae	AB058925
	Placididea	Placididea	Placididea	AB061218
	Aurearenophyceae	Aurearenophyceae	Aurearenophyceae	AB365192
	Phaeophyceae	Phaeophyceae	Dictyotales	AB087135
	Xanthophyceae	Xanthophyceae	Vaucheriales	U41646
	Raphidophyceae	Raphidophyceae	Chattonellales	AB217626
	Slopalinida	Slopalinida	Slopalinida	AF141969
	Synurophyceae	Synurophyceae	Synurales	U73228
unclassified	Breviata	Breviata	Breviata	AF153206
	Collodictyonidae	Collodictyonidae	Collodictyonidae	AF420478
	Cryomonadida	Cryomonadida	Cryomonadida	AF290540
	Dimorpha	Dimorpha	Dimorpha	EF455769
	Metromonas	Metromonas	Metromonas	AY620254
	Mikrocytos	Mikrocytos	Mikrocytos	HM563060
	Multicilia	Multicilia	Multicilia	AY268037
	Palpitomonas	Palpitomonas	Palpitomonas	AB508339
	Paramonas	Paramonas	Paramonas	AY520452
	Phaeomonas	Phaeomonas	Phaeomonas	AB042204
	Proleptomonas	Proleptomonas	Proleptomonas	AF411275
	Pseudodidymium	Pseudodidymium	Pseudodidymium	AY207466
	Reticulamoeba	Reticulamoeba	Reticulamoeba	AY268044
	Telonemia	Telonemia	Telonemia	FJ537314
	Telonemida	Telonemida	Telonemida	AJ564771
	Trimastix	Trimastix	Trimastix	AF244905
Viridiplantae	Chlorophyta	Chlorophyceae	Sphaeropleales	X91267
		Prasinophyceae		DQ025753
		Trebouxiophyceae		AB219527
		Ulvophyceae		Z47997
	Streptophyta	Chlorokybophyceae		M95612
		Klebsormidiophyceae	Klebsormidiales	X75520
		Mesostigmatophyceae		AJ250109
		Zygnemophyceae		AF352221
		Charophyceae		X70704
		Coleochaetophyceae		X68825
		Anthocerotopsida		X80984
		Leiosporocerotopsida		DQ497432
		Takakiopsida		AJ269686
		Sphagnopsida		Y11370
		Andreaeopsida		X99750
		Andreaeobryopsida		AJ275005
		Bryopsida		X74114
		Oedipodiopsida		AF228668
		Polytrichopsida		X80982
		Tetraphidopsida		Y17604
		Haplomitriopsida		Y19006
		Jungermanniopsida		AY688724
		Marchantiopsida		X80987
		Isoetopsida		X83521
		Lycopodiopsida		X81964
		Equisetopsida		X78890
		Marattiopsida		D85301
		Ophioglossopsida		AF313565
		Polypodiopsida		EF024047
		Psilotopsida		X81963
		Coniferopsida		AY544988
		Cycadopsida		M20017
		Ginkgoopsida		D16448
		Gnetopsida		L24045
		basal Magnoliophyta		AF206925
		Ceratophyllales		AF197582
		Liliopsida		AF168884
		magnoliids		DQ472350
		eudicotyledons	Brassicales	X16077
Fungi	Ascomycota	Arthoniomycetes		DQ883706
		Dothideomycetes		GU214659
		Eurotiomycetes		AB033529
		Geoglossomycetes		AY544697
		Lecanoromycetes		AJ421689
		Lichinomycetes		DQ832332
		Leotiomycetes		AY762621
		Sordariomycetes		AB003949
		Orbiliomycetes		AF006307
		Pezizomycetes		U42663
		Saccharomycetes		Z73326
		Neolectomycetes		Z27393
		Pneumocystidomycetes		AB266392
		Schizosaccharomycetes		Z19578
		Taphrinomycetes		AJ495834
	Basidiomycota	Agaricomycetes		FJ869172
		Dacrymycetes		AY771610
		Tremellomycetes		AY863105
		Agaricostilbomycetes		D66881
		Atractiellomycetes		DQ198796
		Cystobasidiomycetes		AB035721
		Microbotryomycetes		HM371376
		Mixiomycetes		D14163
		Pucciniomycetes		DQ831029
		Exobasidiomycetes		DQ785786
		Ustilaginomycetes		DQ846895
	Blastocladiomycota	Blastocladiomycetes		AY635842
	Chytridiomycota	Chytridiomycetes		DQ536473
		Monoblepharidomycetes		Y17504
	Glomeromycota	Glomeromycetes		AB047303
	Neocallimastigomycota	Neocallimastigomycetes		DQ536481
	Entomophthoromycotina	Entomophthoromycotina		U35394
	Kickxellomycotina	Kickxellomycotina		AB287982
	Mucoromycotina	Mucoromycotina		EF623861
	Nephridiophagidae	Nephridiophagidae		AY603958
	Zoopagomycotina	Zygomycetes		AB016009
	Microsporidia	Microsporidia		AF033197
FungiMetazoa group		Choanoflagellida	Choanoflagellida	AF100941
		Corallochytrium	Corallochytrium	L42528
		Eccrinales	Eccrinales	AY336701
		Fonticula	Fonticula	FJ816018
		Ichthyosporea	Capsaspora	AF349564
			Dermocystida	AF533946
			Ichthyophonida	U25637
		Ministeria	Ministeria	AF271998
	Nucleariidae	Nucleariidae	Nucleariidae	AF349563
Metazoa	Cnidaria	Anthozoa		AY026382
	Cnidaria	Cubozoa		AF358106
	Cnidaria	Hydrozoa		AB231884
	Cnidaria	Scyphozoa		AY039208
	Ctenophora	Cyclocoela		AF293687
	Ctenophora	Typhlocoela		AF100944
	Porifera	Calcarea		AF182190
	Porifera	Demospongiae		AY734444
	Porifera	Hexactinellida		AF207844
	Placozoa			Z22783
	Myxozoa	Malacosporea		U70623
		Myxosporea		AM410773
	Acoela			AF329178
	Mesozoa	Orthonectida		X97158
		Rhombozoa		X97157
	Myzostomida			AY210446
	Nemertodermatida			AF051328
	Platyhelminthes	Cestoda		AJ243681
	Platyhelminthes	Cestoda		DQ157224
	Platyhelminthes	Monogenea		AJ228795
	Platyhelminthes	Trematoda		AJ287562
	Platyhelminthes	Turbellaria		AF013149
	Gastrotricha	Chaetonotida		AY963687
	Gastrotricha	Macrodasyida		AY218102
	Gnathostomulida	Bursovaginoidea		AY218110
	Gnathostomulida	Filospermoidea		DQ079929
	Bryozoa	Gymnolaemata		AY210443
	Bryozoa	Phylactolaemata		U12649
	Bryozoa	Stenolaemata		AY210444
	Cycliophora			AY218107
	Entoprocta	Barentsiidae		AY210442
	Entoprocta	Loxosomatidae		AY218100
	Entoprocta	Pedicellinidae		U36273
	Micrognathozoa	Micrognathozoa		AY218108
	Rotifera	Bdelloidea		DQ089736
	Rotifera	Monogononta		U49911
	Rotifera	Seisonidea		DQ089737
	Acanthocephala	Archiacanthocephala		AF064817
	Acanthocephala	Eoacanthocephala		AF001842
	Acanthocephala	Palaeacanthocephala		AF092433
	Acanthocephala	Polyacanthocephala		AF388660
	Mollusca	Aplacophora		X91977
	Mollusca	Bivalvia		AF120539
	Mollusca	Cephalopoda		AY557476
	Mollusca	Cephalopoda		AY145366
	Mollusca	Gastropoda		AF120520
	Mollusca	Monoplacophora		FJ445774
	Mollusca	Polyplacophora		X91975
	Mollusca	Scaphopoda		AF490605
	Nemertea	Anopla		AY145368
	Nemertea	Enopla		U29494
	Brachiopoda	Craniata		DQ279934
	Brachiopoda	Lingulata		X81631
	Brachiopoda	Phoroniformea		AY210450
	Brachiopoda	Rhynchonellata		AF025939
	Annelida	Branchiobdellae		Z83756
	Annelida	Hirudinida		Z83752
	Annelida	Oligochaeta		Z83750
	Annelida	Polychaeta		AY838853
	Annelida	Polychaeta		AY708527
	Echiura	Echiuroinea		AY210441
	Echiura	Xenopneusta		AF342805
	Sipuncula	Phascolosomatidea		X79874
	Sipuncula	Sipunculidea		AF448166
	Chaetognatha	Aphragmophora		AY922316
	Chaetognatha	Monophragmophora		DQ351888
	Chaetognatha	Phragmophora		DQ351884
	Kinorhyncha			U67997
	Priapulida	Priapulidae		X87984
	Priapulida	Tubiluchidae		AY746984
	Loricifera		Nanaloricida	AY746986
	Nematomorpha	Gordioida		AF421771
	Nematomorpha	Nectonematoida		AF421767
	Nematoda	Chromadorea		X03680
	Nematoda	Chromadorea		DQ103704
	Nematoda	Enoplea		AY851265
	Onychophora			U49910
	Tardigrada	Eutardigrada		U49909
	Tardigrada	Heterotardigrada		AY582119
	Arthropoda	Arachnida		Z74478
	Arthropoda	Merostomata		L81949
	Arthropoda	Pycnogonida		AY210808
	Arthropoda	Chilopoda		AY288701
	Arthropoda	Diplopoda		AY859608
	Arthropoda	Pauropoda		DQ399857
	Arthropoda	Symphyla		DQ666177
	Arthropoda	Branchiopoda		AF144214
	Arthropoda	Cephalocarida		AF370801
	Arthropoda	Malacostraca		AJ287064
	Arthropoda	Maxillopoda		DQ826573
	Arthropoda	Ostracoda		AB076658
	Arthropoda	Remipedia		GU067681
	Arthropoda	Hexapoda	Collembola	AY555522
	Arthropoda	Hexapoda	Diplura	AY596366
	Arthropoda	Hexapoda	Protura	AY596355
	Arthropoda	Hexapoda	Archaeognatha	AF370788
	Arthropoda	Hexapoda	Thysanura	AF370790
	Arthropoda	Hexapoda	Odonata	AF461247
	Arthropoda	Hexapoda	Ephemeroptera	AY749906
	Arthropoda	Hexapoda	Plecoptera	U68400ce
	Arthropoda	Hexapoda	Orthoptera	AY521877
	Arthropoda	Hexapoda	Thysanoptera	AY900137
	Arthropoda	Hexapoda	Psocoptera	AY900135
	Arthropoda	Hexapoda	Phthiraptera	AY077778
	Arthropoda	Hexapoda	Hemiptera	U06475
	Arthropoda	Hexapoda	Coleoptera	AY521831
	Arthropoda	Hexapoda	Hymenoptera	AY216699
	Arthropoda	Hexapoda	Lepidoptera	AF423783
	Arthropoda	Hexapoda	Diptera	M21017
	Arthropoda	Hexapoda	Strepsiptera	X77784
	Xenoturbellida			AY291292
	Hemichordata	Enteropneusta		AF236799
	Hemichordata	Pterobranchia		AF236798
	Echinodermata	Asteroidea		AB084553
	Echinodermata	Ophiuroidea		X97156
	Echinodermata	Echinoidea		AF279202
	Echinodermata	Holothuroidea		AY133478
	Echinodermata	Crinoidea		AY275898
	Chordata	Appendicularia		AB013014
	Chordata	Ascidiacea		AF236803
	Chordata	Thaliacea		D14366
	Chordata	Cephalochordata		M97571
	Chordata	Hyperotreti		M97572
	Chordata	Hyperoartia		AY859632
	Chordata	Chondrichthyes		AY049813
	Chordata	Actinopterygii		AF021880
	Chordata	Coelacanthimorpha		L11288
	Chordata	Dipnoi		AF188370
	Chordata	Amphibia		X04025
	Chordata	Testudines		AY859627
	Chordata	Lepidosauria		AY802766
	Chordata	Crocodylidae		AJ311672
	Chordata	Aves		AF173612
	Chordata	Mammalia		U13369
